# Supplementary material for: Mesoporous Li4Ti5O12−x/C submicrospheres with comprehensively improved electrochemical performances for high-power lithium-ion batteries
Source: Royal Society of Chemistry journal article supplement (doi:10.1039/c4cp03826f), 2014-01-01
Supplement: c4cp03826f1.pdf [file c4cp03826f1.pdf]

## Electronic Supplementary Information

### Mesoporous $\text{Li}_4\text{Ti}_5\text{O}_{12-x}/\text{C}$ submicrospheres with comprehensively improved electrochemical performances for high-power lithium-ion batteries

Chunfu Lin<sup>a</sup>, Man On Lai<sup>a</sup>, Henghui Zhou<sup>b\*</sup>, Li Lu<sup>a\*</sup>

<sup>a</sup> Department of Mechanical Engineering, National University of Singapore, 9 Engineering Drive 1, Singapore 117576, Singapore

<sup>b</sup> College of Chemistry and Molecular Engineering, Peking University, Beijing 100871, PR China.

\* Corresponding authors. Tel.: +65 65162236; fax: +65 67791459. E-mail address: luli@nus.edu.sg (L. Lu).

Tel.: +86 10 62757908; fax: +86 10 62757908. E-mail address: hhzhou@pku.edu.cn (H. Zhou).

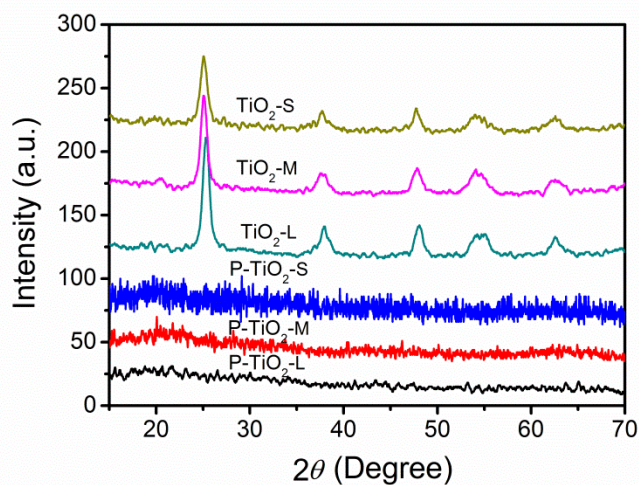

Fig. S1. XRD spectra of P-TiO<sub>2</sub>-L, P-TiO<sub>2</sub>-M, P-TiO<sub>2</sub>-S, TiO<sub>2</sub>-L, TiO<sub>2</sub>-M and TiO<sub>2</sub>-S.

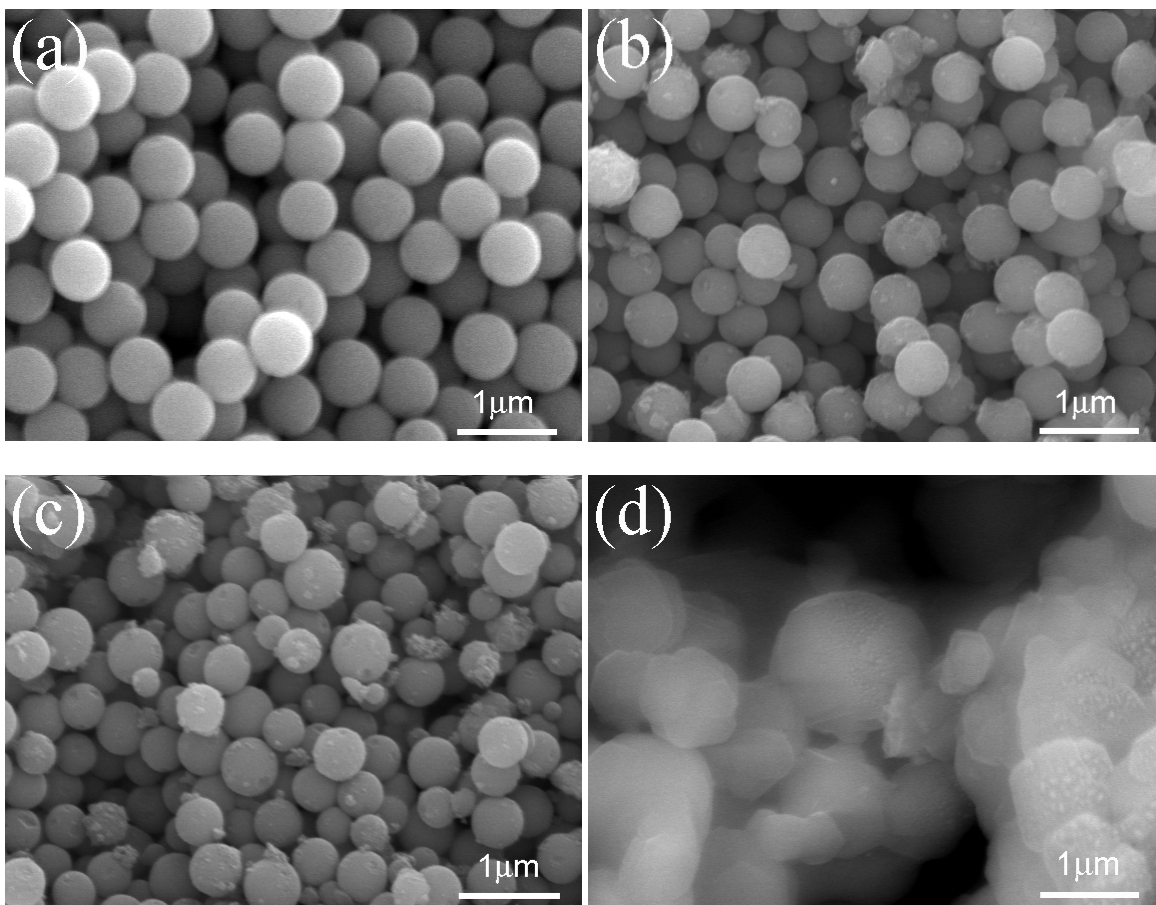

Fig. S2. FESEM images of (a)  $\text{TiO}_2\text{-L}$ , (b)  $\text{TiO}_2\text{-M}$ , (c)  $\text{TiO}_2\text{-S}$  and (d) LTO-S.

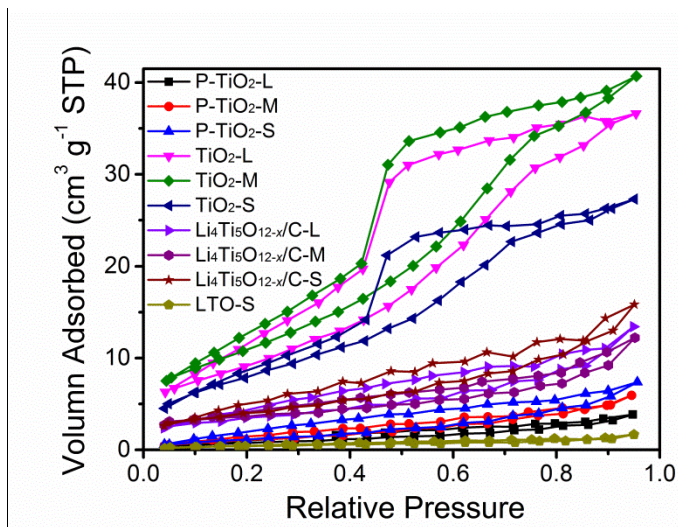

Fig. S3. Nitrogen adsorption-desorption isotherms of P-TiO<sub>2</sub>-L, P-TiO<sub>2</sub>-M, P-TiO<sub>2</sub>-S, TiO<sub>2</sub>-L, TiO<sub>2</sub>-M, TiO<sub>2</sub>-S, Li<sub>4</sub>Ti<sub>5</sub>O<sub>12-x</sub>/C-L, Li<sub>4</sub>Ti<sub>5</sub>O<sub>12-x</sub>/C-M, Li<sub>4</sub>Ti<sub>5</sub>O<sub>12-x</sub>/C-S and LTO-S.

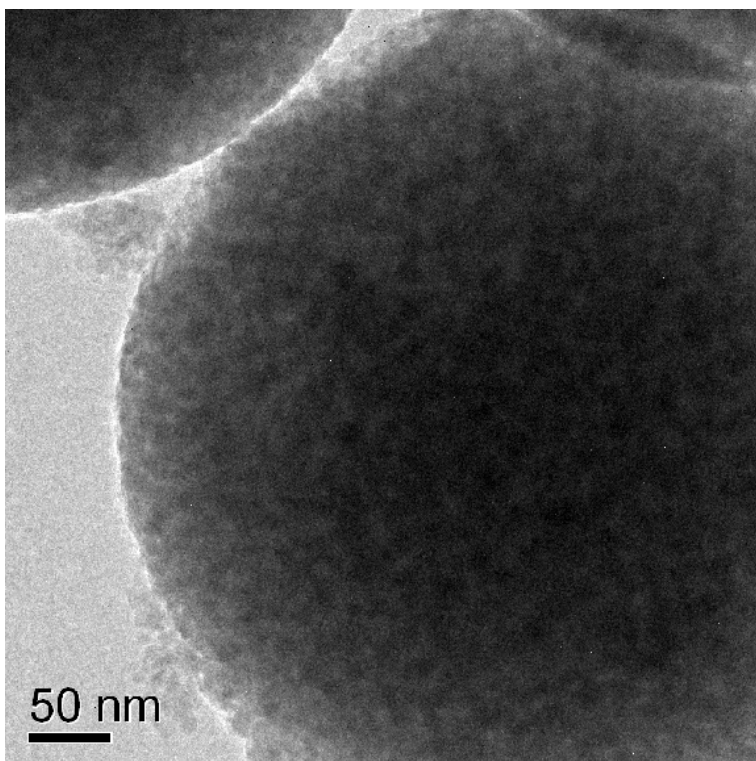

Fig. S4. TEM image of TiO<sub>2</sub>-L.

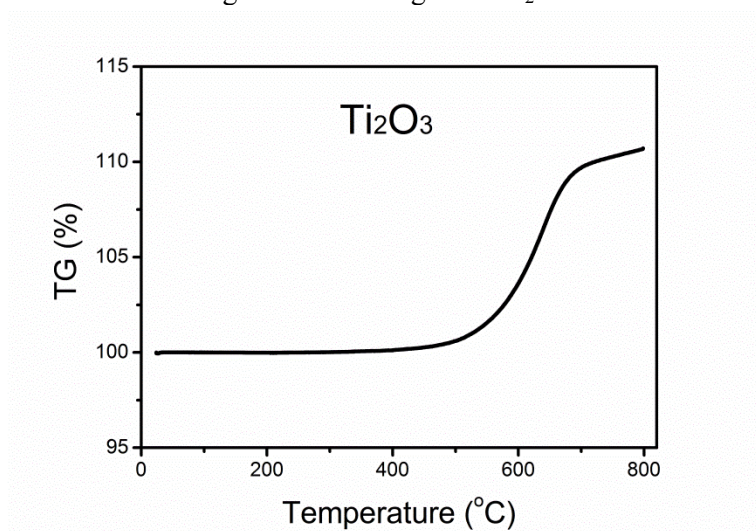

Fig. S5. TG curve of Ti<sub>2</sub>O<sub>3</sub> powders.

### Refinement process:

Three constraints for the refinements have been set. Firstly, the site occupancies of the LTO-type crystals in the three composites fulfill stoichiometric composition of Li<sub>4</sub>Ti<sub>5</sub>O<sub>12-x</sub>, while that of LTO-S follows

$\text{Li}_4\text{Ti}_5\text{O}_{12}$ . Secondly, the contents of  $\text{Ti}^{3+}$  and  $\text{Ti}^{4+}$  ions are fixed based on the TG results. Finally, the distribution of ions in the spinel structure is fixed as follows:  $\text{O}^{2-}$  ions were located at 32e sites;  $\text{Li}^+$  and  $\text{Ti}^{4+}$  ions are distributed at both 16d and 8a sites while  $\text{Ti}^{3+}$  ions only stay at 16d sites. In principle,  $\text{Ti}^{3+}$  ions can reside at both 16d and 8a sites. However, it is impossible by the refinements of the X-ray diffraction profiles to distinguish  $\text{Ti}^{3+}$  and  $\text{Ti}^{4+}$  ions because these two kinds of ions have very close X-ray scattering factors.  $\text{Ti}^{3+}$  ion has a octahedral site preference energy (OSPE,  $28.89 \text{ kJ mol}^{-1}$ ) significantly larger than  $\text{Ti}^{4+}$  ion ( $0 \text{ kJ mol}^{-1}$ ) [S1], inferring that  $\text{Ti}^{3+}$  ion has a tendency to occupy 16d sites much higher than  $\text{Ti}^{4+}$  ion. Therefore, to proceed the refinements, it can reasonably be assumed that  $\text{Ti}^{3+}$  ions only stay at 16d sites, while  $\text{Ti}^{4+}$  ions are distributed in both 16d and 8a sites. In the refinement process, background parameters, zero-shift, unit cell parameters, profile parameters, atomic fractional coordinates, atomic isotropic displacement parameters and atomic occupancies were successively refined.

## Reference

[S1] R. G. Burns, Mineralogical Applications of Crystal Field Theory, Cambridge University Press, Cambridge, 2nd edn, 1993.

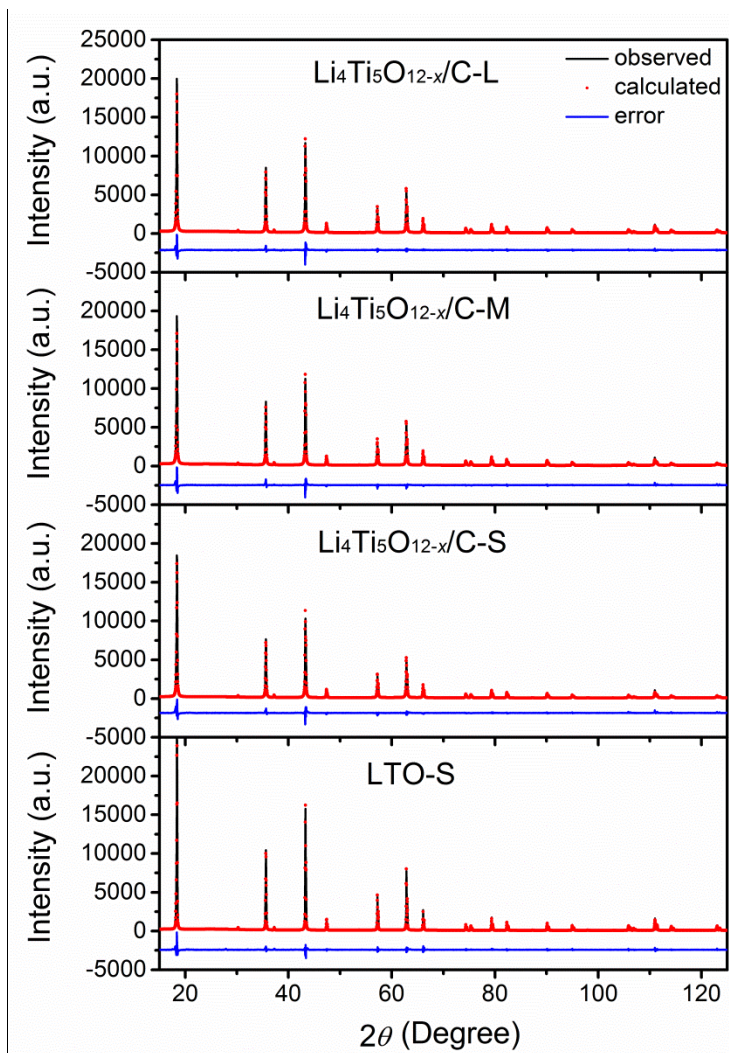

Fig. S6. Rietveld refinement patterns for  $\text{Li}_4\text{Ti}_5\text{O}_{12-x}/\text{C-L}$ ,  $\text{Li}_4\text{Ti}_5\text{O}_{12-x}/\text{C-M}$ ,  $\text{Li}_4\text{Ti}_5\text{O}_{12-x}/\text{C-S}$  and LTO-S.

Table S1. Material characteristics of prepared powders.

| Sample                                                 | Sphere size (nm) | Primary particle size (nm) | Crystallinity | Specific surface area (m <sup>2</sup> g <sup>-1</sup> ) | Pore size (nm) | Pore volume (cm <sup>3</sup> g <sup>-1</sup> ) | Carbon content (%) | Tap density (g cm <sup>-3</sup> ) |
|--------------------------------------------------------|------------------|----------------------------|---------------|---------------------------------------------------------|----------------|------------------------------------------------|--------------------|-----------------------------------|
| P-TiO <sub>2</sub> -L                                  | 800±30           | –                          | amorphous     | 3.35                                                    | 4.42           | 0.006                                          | –                  | –                                 |
| P-TiO <sub>2</sub> -M                                  | –                | –                          | amorphous     | 4.51                                                    | 4.92           | 0.009                                          | –                  | –                                 |
| P-TiO <sub>2</sub> -S                                  | –                | –                          | amorphous     | 4.99                                                    | 5.42           | 0.011                                          | –                  | –                                 |
| TiO <sub>2</sub> -L                                    | 610±30           | ~10                        | poor          | 35.5                                                    | 4.04           | 0.057                                          | –                  | –                                 |
| TiO <sub>2</sub> -M                                    | –                | ~10                        | poor          | 41.3                                                    | 3.90           | 0.063                                          | –                  | –                                 |
| TiO <sub>2</sub> -S                                    | –                | ~10                        | poor          | 31.0                                                    | 3.57           | 0.042                                          | –                  | –                                 |
| Li <sub>4</sub> Ti <sub>5</sub> O <sub>12-x</sub> /C-L | 530±30           | mainly <100                | high          | 12.3                                                    | 3.92           | 0.019                                          | 1.44               | 1.41                              |
| Li <sub>4</sub> Ti <sub>5</sub> O <sub>12-x</sub> /C-M | –                | mainly <100                | high          | 12.2                                                    | 4.26           | 0.021                                          | 1.28               | 1.57                              |
| Li <sub>4</sub> Ti <sub>5</sub> O <sub>12-x</sub> /C-S | –                | mainly <100                | high          | 14.6                                                    | 4.19           | 0.025                                          | 1.06               | 1.71                              |
| LTO-S                                                  | –                | 200–3000                   | high          | 1.52                                                    | 3.40           | 0.002                                          | –                  | 1.22                              |

Table S2. Electrochemical performances of  $\text{Li}_4\text{Ti}_5\text{O}_{12-x}/\text{C-L}$ ,  $\text{Li}_4\text{Ti}_5\text{O}_{12-x}/\text{C-M}$ ,  $\text{Li}_4\text{Ti}_5\text{O}_{12-x}/\text{C-S}$  and LTO-S samples.

| Sample                                             | Discharge potential at 0.1 C (mV) | Charge potential at 0.1 C (mV) | Working potential at 0.1 C (mV) | Charge capacity at 0.5 C ( $\text{mAh g}^{-1}$ ) | Charge capacity at 1 C ( $\text{mAh g}^{-1}$ ) | Charge capacity at 2 C ( $\text{mAh g}^{-1}$ ) | Charge capacity at 5 C ( $\text{mAh g}^{-1}$ ) | Charge capacity at 10 C ( $\text{mAh g}^{-1}$ ) | First cycle Coulombic efficiency (%) | Capacity retention over 100 cycles (%) | $R_{\Omega}$ ( $\Omega$ ) | $R_s$ ( $\Omega$ ) | $R_{ct}$ ( $\Omega$ ) |
|----------------------------------------------------|-----------------------------------|--------------------------------|---------------------------------|--------------------------------------------------|------------------------------------------------|------------------------------------------------|------------------------------------------------|-------------------------------------------------|--------------------------------------|----------------------------------------|---------------------------|--------------------|-----------------------|
| $\text{Li}_4\text{Ti}_5\text{O}_{12-x}/\text{C-L}$ | 1552.8                            | 1569.0                         | 1560.9                          | 160                                              | 152                                            | 144                                            | 129                                            | 108                                             | 94.6                                 | 95.8                                   | 2.08                      | 313                | 734                   |
| $\text{Li}_4\text{Ti}_5\text{O}_{12-x}/\text{C-M}$ | 1553.9                            | 1567.3                         | 1560.6                          | 162                                              | 156                                            | 149                                            | 133                                            | 113                                             | 93.8                                 | 95.5                                   | 2.62                      | 296                | 635                   |
| $\text{Li}_4\text{Ti}_5\text{O}_{12-x}/\text{C-S}$ | 1554.7                            | 1566.8                         | 1560.8                          | 163                                              | 159                                            | 153                                            | 138                                            | 118                                             | 95.0                                 | 95.9                                   | 2.48                      | 274                | 474                   |
| LTO-S                                              | 1556.2                            | 1574.4                         | 1565.3                          | 148                                              | 115                                            | 72                                             | 27                                             | 12                                              | 96.1                                 | -                                      | 3.59                      | -                  | 1021                  |
